# Supplementary material for: Arabidopsis TRM5 encodes a nuclear-localised bifunctional tRNA guanine and inosine-N1-methyltransferase that is important for growth
Source: PLoS One. 2019 Nov 22;14(11):e0225064. doi: 10.1371/journal.pone.0225064 (PMC6874348; doi:10.1371/journal.pone.0225064)
Supplement: S3 Table — (XLSX) [file pone.0225064.s008.xlsx]

## Sheet: WT vs trm5-1
Supplementary Table S3. Differentially abundant proteins identified by LC-MS/MS analysis of wild type and trm5-1.
Up-regulated in trm5-1
Accession	Description	trm5/WT	t test p value	BH adjusted p-value	Unique Peptides	Peptides	PSMs	AAs	MW [kDa]	calc. pI	trm5-1/REF	trm5-2/REF	trm5-3/REF	average trm	WT-1/REF	WT-2/REF	WT-3/REF	average WT
AT1G03540.1	Pentatricopeptide repeat (PPR-like) superfamily protein	3.12815	0.0292542	0.0334516	1	1	1	609	67.3581	8.44092	1.84716	0.892142	1.77562	1.50498	0.435603	0.509823	0.497897	0.481108
AT4G02520.1	glutathione S-transferase PHI 2	1.60557	0.00240321	0.00619651	9	11	44	212	24.1136	6.354	1.18764	1.22875	1.30717	1.24119	0.857899	0.659873	0.801379	0.773051
AT3G06730.1	Thioredoxin z	1.48774	0.0204944	0.0250699	3	3	4	183	20.6567	5.93506	1.19591	1.21414	1.20231	1.20412	1.01139	0.652619	0.764068	0.809359
AT2G41100.1	Calcium-binding EF hand family protein	1.4396	0.000147984	0.00233874	3	3	3	324	36.7839	5.04639	1.17779	1.16572	1.20912	1.18421	0.791199	0.865494	0.811092	0.822595
AT5G08040.1	mitochondrial import receptor subunit TOM5 homolog	1.43302	0.00550718	0.00960029	1	1	1	54	6.0871	8.63135	1.07942	1.22947	1.23005	1.17965	0.882608	0.741978	0.844988	0.823191
AT4G26130.1	unknown protein; FUNCTIONS IN: molecular_function unknown; INVOLVED IN: biological_process unknown; LOCATED IN: endomembrane system; EXPRESSED IN: 23 plant structures; EXPRESSED DURING: 13 growth stages; BEST Arabidopsis thaliana protein match is: unknown protein (TAIR:AT5G56980.1); Has 121 Blast hits to 116 proteins in 19 species: Archae - 0; Bacteria - 0; Metazoa - 4; Fungi - 0; Plants - 113; V…	1.42518	0.0151482	0.0196255	1	1	2	286	32.7355	8.92432	1.01368	1.29065	1.20143	1.16859	0.856439	0.832742	0.77069	0.819957
AT2G30860.2	glutathione S-transferase PHI 9	1.40734	0.00420212	0.00824744	5	6	38	166	18.6096	6.53662	1.15221	1.22308	1.13989	1.17172	0.915718	0.738016	0.844015	0.832583
AT5G16930.1	AAA-type ATPase family protein	1.3837	0.00878016	0.0128288	1	2	2	644	70.949	9.5249	1.23829	1.1467	1.10755	1.16418	0.732085	0.911195	0.880774	0.841352
AT2G40360.1	Transducin/WD40 repeat-like superfamily protein	1.37842	0.000999983	0.00428895	1	1	1	753	85.3303	5.30029	1.1286	1.18982	1.16208	1.16017	0.78121	0.89249	0.851292	0.841664
AT3G20410.1	calmodulin-domain protein kinase 9	1.37513	0.0419191	0.0453692	2	4	5	541	60.3245	6.17627	1.11326	1.01482	1.30603	1.1447	0.719644	0.934707	0.842951	0.832434
AT3G23620.1	Ribosomal RNA processing Brix domain protein	1.37441	0.00124163	0.00469231	1	1	1	314	35.7049	9.72998	1.18443	1.21549	1.08689	1.16227	0.838387	0.848136	0.85043	0.845651
AT2G20530.1	prohibitin 6	1.36743	0.00625017	0.0102737	2	3	4	286	31.6171	9.64209	1.13134	1.2287	1.12059	1.16021	0.874909	0.754839	0.915619	0.848455
AT1G14880.1	PLANT CADMIUM RESISTANCE 1	1.36647	0.0162892	0.0208979	1	1	1	151	16.4914	7.62061	1.12273	1.13949	1.19545	1.15256	0.937958	0.895566	0.696846	0.843457
AT2G21060.1	glycine-rich protein 2B	1.35734	0.00118745	0.00469231	1	3	4	201	19.0654	6.75635	1.18016	1.18479	1.10054	1.15516	0.801546	0.879488	0.872108	0.851047
AT5G42790.1	proteasome alpha subunit F1	1.3546	0.0486624	0.0494949	2	11	24	278	30.4571	5.08447	1.30318	0.96612	1.15032	1.13987	0.772475	0.831924	0.920047	0.841482
AT4G25100.1	Fe superoxide dismutase 1	1.34609	0.0027498	0.00665743	5	5	13	212	23.776	6.52197	1.18013	1.10104	1.15319	1.14479	0.917135	0.849316	0.784904	0.850452
AT4G32720.2	La protein 1	1.33586	0.000151173	0.00233874	7	7	9	404	44.9415	4.90674	1.15019	1.13901	1.1353	1.1415	0.818369	0.887471	0.857672	0.854504
AT1G21250.1	cell wall-associated kinase	1.32419	0.0028351	0.00665743	3	5	5	735	81.1589	5.68115	1.23717	1.10041	1.15119	1.16292	0.893085	0.843369	0.898187	0.878213
AT3G23830.1	glycine-rich RNA-binding protein 4	1.32062	0.0063224	0.0103279	1	1	1	136	14.1198	8.49951	1.24039	1.11728	1.07014	1.1426	0.836049	0.874325	0.885223	0.865199
AT3G11450.1	DnaJ domain ;Myb-like DNA-binding domain	1.31157	0.000850254	0.00416287	3	5	6	647	73.9448	8.49951	1.18921	1.09982	1.13968	1.1429	0.841938	0.895311	0.876959	0.871402
AT3G62200.1	Putative endonuclease or glycosyl hydrolase	1.30741	0.00682643	0.0107506	1	1	1	673	74.1399	8.99756	1.12756	1.09585	1.17583	1.13308	0.955931	0.844041	0.800013	0.866661
AT4G27990.1	YGGT family protein	1.30659	0.00689735	0.0107976	1	1	1	218	23.69	11.2827	1.11275	1.09922	1.18685	1.13294	0.955541	0.824593	0.821159	0.867098
AT1G25260.1	Ribosomal protein L10 family protein	1.30541	0.0493091	0.0494949	2	2	2	235	27.225	8.20654	1.19919	1.15314	1.03644	1.12959	0.720854	0.872518	1.00256	0.865311
AT5G35735.1	Auxin-responsive family protein	1.30312	0.000127243	0.00233874	1	1	1	404	43.8402	9.53955	1.14191	1.13444	1.12338	1.13325	0.895287	0.876684	0.836949	0.86964
AT1G79390.1	unknown protein; Has 30201 Blast hits to 17322 proteins in 780 species: Archae - 12; Bacteria - 1396; Metazoa - 17338; Fungi - 3422; Plants - 5037; Viruses - 0; Other Eukaryotes - 2996 (source: NCBI BLink).	1.30268	0.00176723	0.00534232	1	1	1	126	14.5514	9.74463	1.11809	1.14134	1.14333	1.13425	0.916239	0.802774	0.893117	0.87071
AT2G44310.1	Calcium-binding EF-hand family protein	1.30235	0.043821	0.0463208	4	4	5	142	15.8108	4.51318	1.0716	1.20742	1.14488	1.1413	0.96515	0.711975	0.951895	0.87634
AT3G28900.1	Ribosomal protein L34e superfamily protein	1.29729	0.00604892	0.0101556	2	4	11	120	13.6417	11.3706	1.19157	1.13638	1.07202	1.13332	0.877749	0.811658	0.931411	0.873606
ATCG00560.1	photosystem II reaction center protein L	1.29423	0.0434093	0.0462212	1	1	4	38	4.46726	4.50049	1.02146	1.10203	1.25992	1.1278	0.973667	0.795106	0.845461	0.871411
AT1G02930.1	glutathione S-transferase 6	1.29128	0.00126227	0.00469231	2	7	20	208	23.4712	6.22705	1.09667	1.11862	1.16531	1.12687	0.914837	0.871385	0.831799	0.872674
AT4G08310.1	FUNCTIONS IN: molecular_function unknown; INVOLVED IN: biological_process unknown; LOCATED IN: cellular_component unknown; EXPRESSED IN: 25 plant structures; EXPRESSED DURING: 13 growth stages; CONTAINS InterPro DOMAIN/s: Histone chaperone domain CHZ (InterPro:IPR019098); BEST Arabidopsis thaliana protein match is: unknown protein (TAIR:AT1G44780.2); Has 53711 Blast hits to 33687 proteins in 1618…	1.29104	0.00400034	0.00815573	1	1	1	504	56.202	4.95752	1.12412	1.15666	1.10971	1.13016	0.953999	0.819198	0.852969	0.875389
AT4G12610.1	transcription activators;DNA binding;RNA polymerase II transcription factors;catalytics;transcription initiation factors	1.29029	0.028914	0.0332069	1	1	1	400	43.8373	4.77979	1.27438	1.02947	1.08436	1.1294	0.892282	0.892511	0.841125	0.875306
AT2G38530.1	lipid transfer protein 2	1.28924	0.00653661	0.0104856	5	5	7	118	11.9299	8.96826	1.06791	1.08712	1.19242	1.11582	0.858718	0.918238	0.819505	0.865487
AT4G38740.1	rotamase CYP 1	1.28562	0.0145479	0.0193238	2	7	19	172	18.3611	7.81104	1.0588	1.19603	1.12845	1.12776	0.88282	0.79482	0.953986	0.877209
AT3G04120.1	glyceraldehyde-3-phosphate dehydrogenase C subunit 1	1.28487	0.00143874	0.00484695	2	22	174	338	36.8911	7.12256	1.1774	1.12784	1.1063	1.13718	0.839291	0.922541	0.893335	0.885056
AT3G06680.2	Ribosomal L29e protein family	1.28087	0.0189814	0.0236593	1	1	4	61	7.03468	11.3999	1.028	1.17728	1.14061	1.1153	0.872166	0.949544	0.790486	0.870732
AT4G12480.1	Bifunctional inhibitor/lipid-transfer protein/seed storage 2S albumin superfamily protein	1.27744	0.00551195	0.00960029	1	1	1	168	17.2971	8.95361	1.07096	1.09909	1.19624	1.1221	0.875894	0.8387	0.920597	0.878397
AT3G05500.1	Rubber elongation factor protein (REF)	1.27656	0.0284155	0.0327775	2	2	2	246	27.1773	8.26514	1.20805	1.01977	1.13198	1.11993	0.821361	0.839219	0.971335	0.877305
AT2G40430.3	FUNCTIONS IN: molecular_function unknown; INVOLVED IN: biological_process unknown; LOCATED IN: cellular_component unknown; EXPRESSED IN: 22 plant structures; EXPRESSED DURING: 13 growth stages; CONTAINS InterPro DOMAIN/s: Tumour suppressor protein Gltscr2 (InterPro:IPR011211), P60-like (InterPro:IPR011687).	1.26934	0.00501884	0.00924642	1	1	1	441	50.0023	8.93896	1.12728	1.10136	1.12796	1.11887	0.812456	0.956045	0.875867	0.881456
AT4G12790.1	P-loop containing nucleoside triphosphate hydrolases superfamily protein	1.26597	0.00153152	0.0049727	1	1	1	271	30.796	4.50049	1.0756	1.11183	1.16466	1.11736	0.914051	0.873422	0.860375	0.882616
AT3G46430.1	unknown protein; FUNCTIONS IN: molecular_function unknown; INVOLVED IN: biological_process unknown; LOCATED IN: mitochondrion, mitochondrial respiratory chain complex III; EXPRESSED IN: 25 plant structures; EXPRESSED DURING: 15 growth stages; BEST Arabidopsis thaliana protein match is: unknown protein (TAIR:AT5G59613.2); Has 51 Blast hits to 51 proteins in 16 species: Archae - 0; Bacteria - 0; Me…	1.26587	0.0463142	0.047975	1	1	2	55	6.58047	10.1548	1.1376	1.09769	1.1206	1.11863	1.03849	0.761694	0.850877	0.883686
AT2G05840.1	20S proteasome subunit PAA2	1.26216	0.00126554	0.00469231	1	8	14	246	27.3328	6.0874	1.10978	1.16846	1.08012	1.11945	0.872789	0.876585	0.911432	0.886935
AT1G54270.1	eif4a-2	1.26154	0.000482845	0.00334179	5	19	75	412	46.7329	5.68115	1.09506	1.16251	1.10027	1.11928	0.882054	0.881758	0.897904	0.887239
AT1G07920.1	GTP binding Elongation factor Tu family protein	1.26031	0.000139137	0.00233874	21	21	119	449	49.4708	9.11475	1.08918	1.1287	1.12108	1.11299	0.887742	0.898686	0.862896	0.883108
AT1G48920.1	nucleolin like 1	1.26009	0.000289955	0.00305033	16	16	35	557	58.7386	5.22412	1.14581	1.12376	1.09543	1.12167	0.893906	0.866001	0.910539	0.890149
AT1G51720.1	Amino acid dehydrogenase family protein	1.26003	0.00245915	0.0062188	1	1	1	637	70.8902	6.72705	1.10386	1.13929	1.10866	1.11727	0.950893	0.853383	0.855837	0.886704
AT3G07050.1	GTP-binding family protein	1.25539	0.00378779	0.00799746	6	6	8	582	65.7445	8.54346	1.14613	1.06856	1.10795	1.10755	0.824803	0.896951	0.924946	0.882233
AT4G28510.1	prohibitin 1	1.25293	0.0123991	0.0171629	4	7	13	288	31.6869	9.26123	1.12162	1.17537	1.09344	1.13014	0.941465	0.808465	0.956074	0.902001
AT2G33180.1	unknown protein; FUNCTIONS IN: molecular_function unknown; INVOLVED IN: biological_process unknown; LOCATED IN: chloroplast stroma; EXPRESSED IN: 22 plant structures; EXPRESSED DURING: 13 growth stages; Has 57 Blast hits to 57 proteins in 22 species: Archae - 0; Bacteria - 8; Metazoa - 0; Fungi - 0; Plants - 35; Viruses - 0; Other Eukaryotes - 14 (source: NCBI BLink).	1.25281	0.00477631	0.00910268	1	1	4	166	18.3527	6.18896	1.15194	1.11656	1.08618	1.11823	0.844415	0.872709	0.9606	0.892575
AT5G36290.1	Uncharacterized protein family (UPF0016)	1.2506	0.0140098	0.0188953	1	1	1	293	31.5055	7.45947	1.05361	1.18307	1.10801	1.1149	0.935476	0.815395	0.923597	0.89149
AT1G80750.1	Ribosomal protein L30/L7 family protein	1.24851	0.0103938	0.0147949	2	2	3	247	28.3264	9.72998	1.06249	1.17013	1.07089	1.10117	0.827984	0.943357	0.874624	0.881988
AT1G05410.2	Protein of unknown function (DUF1423)	1.24728	0.0433974	0.0462212	1	1	1	444	50.2898	5.59229	1.02865	1.19272	1.12158	1.11432	0.902191	0.787076	0.99091	0.893392
AT4G21105.2	cytochrome-c oxidases;electron carriers	1.2452	0.0469623	0.0482464	2	2	2	48	5.70108	9.83252	1.10881	1.13714	1.08792	1.11129	1.03252	0.772293	0.872566	0.89246
AT1G51760.1	peptidase M20/M25/M40 family protein	1.24436	0.00442949	0.00859615	3	3	5	440	48.2325	6.72705	1.11146	1.02793	1.14604	1.09515	0.855461	0.893128	0.891668	0.880086
AT1G05010.1	ethylene-forming enzyme	1.24357	0.000254824	0.00305033	9	11	28	323	36.6535	5.36377	1.08403	1.09123	1.13122	1.10216	0.895747	0.896317	0.866797	0.886287
AT4G16250.1	phytochrome D	1.24195	0.00655161	0.0104856	1	1	1	1164	129.185	6.17627	1.10624	1.09036	1.13154	1.10938	0.818819	0.905766	0.955191	0.893259
AT1G21720.1	proteasome beta subunit C1	1.2411	0.0335959	0.0376108	1	1	2	204	22.7835	5.46533	1.07346	1.17275	1.27281	1.17301	0.932752	1.02462	0.878024	0.945133
AT5G40770.1	prohibitin 3	1.23891	0.00161893	0.00512986	9	9	19	277	30.381	7.63525	1.08878	1.13027	1.07423	1.09776	0.921983	0.845246	0.890965	0.886065
AT3G44750.2	histone deacetylase 3	1.23836	0.000231145	0.00303956	6	6	8	242	25.9689	5.45264	1.13711	1.09517	1.1183	1.11686	0.921226	0.904731	0.87969	0.901883
AT5G11670.1	NADP-malic enzyme 2	1.23763	0.000732185	0.00416287	14	18	33	588	64.3722	6.41748	1.08802	1.10194	1.15413	1.1147	0.881382	0.919396	0.901234	0.900671
AT5G57290.2	60S acidic ribosomal protein family	1.23516	0.00546651	0.00960029	2	2	3	89	8.93938	5.2876	1.03594	1.12095	1.15827	1.10505	0.921047	0.881767	0.881182	0.894665
AT3G52730.1	ubiquinol-cytochrome C reductase UQCRX/QCR9-like family protein	1.23469	0.0214154	0.0260753	2	2	3	72	8.44332	9.46631	1.1298	1.08064	1.09616	1.1022	0.96333	0.783821	0.930917	0.892689
AT5G64400.1	CONTAINS InterPro DOMAIN/s: CHCH (InterPro:IPR010625); BEST Arabidopsis thaliana protein match is: Cox19-like CHCH family protein (TAIR:AT5G09570.1); Has 1807 Blast hits to 1807 proteins in 277 species: Archae - 0; Bacteria - 0; Metazoa - 736; Fungi - 347; Plants - 385; Viruses - 0; Other Eukaryotes - 339 (source: NCBI BLink).	1.23448	0.00822626	0.0122926	1	1	1	144	14.3949	9.21729	1.07161	1.09622	1.14445	1.10409	0.834324	0.962978	0.885837	0.89438
AT1G69250.2	Nuclear transport factor 2 (NTF2) family protein with RNA binding (RRM-RBD-RNP motifs) domain	1.23345	0.000203613	0.00287899	4	4	8	389	42.8863	8.95361	1.08529	1.12418	1.11982	1.10976	0.901105	0.917222	0.880841	0.899723
AT3G57520.3	seed imbibition 2	1.23331	0.0024433	0.0062188	1	1	1	565	62.481	5.93506	1.12911	1.06409	1.12444	1.10588	0.855598	0.901115	0.933311	0.896675
AT5G22650.2	histone deacetylase 2B	1.23209	3.3052e-05	0.00190711	11	11	19	305	32.1996	4.81787	1.10473	1.10893	1.10063	1.10476	0.909385	0.903288	0.877311	0.896661
AT1G03860.1	prohibitin 2	1.23166	0.00514625	0.00933424	3	6	14	286	31.791	9.39307	1.14777	1.11317	1.05107	1.104	0.936267	0.851918	0.900872	0.896352
AT4G15770.1	RNA binding	1.23157	0.0114652	0.016039	1	1	1	187	20.5976	8.25049	1.02988	1.13822	1.14784	1.10531	0.913303	0.843325	0.935817	0.897481
AT3G13920.1	eukaryotic translation initiation factor 4A1	1.23134	0.000932215	0.00416287	3	18	76	412	46.675	5.68115	1.14005	1.08541	1.09309	1.10618	0.894932	0.871772	0.928372	0.898359
AT5G58420.1	Ribosomal protein S4 (RPS4A) family protein	1.23108	0.013358	0.0182827	1	17	62	262	29.7972	10.2134	1.01078	1.15873	1.1432	1.10424	0.923353	0.875677	0.891862	0.896964
AT1G78370.1	glutathione S-transferase TAU 20	1.23054	0.000664845	0.00406638	10	12	41	217	24.9906	5.78271	1.07033	1.12214	1.11903	1.10384	0.920672	0.873539	0.896883	0.897031
AT1G14060.1	GCK domain-containing protein	1.22971	0.000771894	0.00416287	3	3	3	179	19.4148	4.33545	1.07465	1.1411	1.09741	1.10439	0.897324	0.917559	0.87939	0.898091
AT1G29030.1	Apoptosis inhibitory protein 5 (API5)	1.22796	0.00807558	0.0121661	1	1	1	556	62.2409	8.77783	1.04132	1.17987	1.09092	1.10404	0.889293	0.920118	0.887848	0.899086
AT1G07070.1	Ribosomal protein L35Ae family protein	1.22742	0.00575733	0.00989659	1	3	6	112	12.8398	10.6821	1.0559	1.16452	1.08974	1.10339	0.907821	0.928844	0.860183	0.898949
AT1G49340.2	Phosphatidylinositol 3- and 4-kinase family protein	1.22609	0.0151294	0.0196255	1	1	1	2028	223.876	6.48096	1.17564	1.127	1.0157	1.10611	0.931303	0.899664	0.875469	0.902145
AT3G16400.1	nitrile specifier protein 1	1.221	0.0017665	0.00534232	12	13	20	470	51.6376	5.52881	1.10481	1.07543	1.12821	1.10282	0.859158	0.920792	0.92968	0.90321
AT4G00810.1	60S acidic ribosomal protein family	1.22092	0.0440528	0.0463208	2	2	2	113	11.2995	4.32275	1.06757	1.19025	1.04228	1.10003	0.994892	0.889266	0.818808	0.900989
AT2G34357.1	ARM repeat superfamily protein	1.21976	0.00392091	0.00811969	1	1	1	1280	141.707	8.48486	1.08856	1.07142	1.13576	1.09858	0.93694	0.91692	0.848091	0.90065
AT1G01100.3	60S acidic ribosomal protein family	1.21849	0.00844595	0.0124791	1	1	1	96	9.99391	4.36084	1.14553	1.05142	1.10282	1.09992	0.962355	0.883228	0.862508	0.902697
AT4G30800.1	Nucleic acid-binding, OB-fold-like protein	1.21777	0.00657841	0.0104856	2	6	8	159	17.9197	10.7261	1.10175	1.07899	1.11798	1.09957	0.969048	0.844365	0.895401	0.902938
AT1G75950.1	S phase kinase-associated protein 1	1.21603	0.0196669	0.0243981	2	3	5	160	17.8458	4.53857	1.08496	1.11831	1.10273	1.102	0.962829	0.804281	0.951581	0.90623
AT2G43780.1	unknown protein; Has 30 Blast hits to 30 proteins in 11 species: Archae - 0; Bacteria - 0; Metazoa - 0; Fungi - 0; Plants - 30; Viruses - 0; Other Eukaryotes - 0 (source: NCBI BLink).	1.2159	0.0013631	0.00471704	1	1	1	67	7.13364	8.47021	1.08243	1.12602	1.08891	1.09912	0.940158	0.902481	0.869221	0.903953
AT3G55620.1	Translation initiation factor IF6	1.21265	0.000563524	0.00370103	3	3	3	245	26.4653	4.7417	1.08165	1.12507	1.09378	1.10017	0.905579	0.883288	0.932851	0.907239
AT1G66240.1	homolog of anti-oxidant 1	1.21175	0.0170435	0.0215502	1	3	7	106	11.4229	7.94287	1.0367	1.11016	1.11874	1.08854	0.915886	0.820623	0.958442	0.898317
AT4G31500.1	cytochrome P450, family 83, subfamily B, polypeptide 1	1.21149	0.00205014	0.00579772	11	11	24	499	56.8096	8.36768	1.05999	1.13397	1.09841	1.09745	0.895146	0.884529	0.937943	0.905873
AT1G21130.1	O-methyltransferase family protein	1.20954	0.00956453	0.0138976	4	4	5	373	40.7215	5.14795	1.07903	1.03898	1.13895	1.08565	0.92213	0.928843	0.841757	0.897577
AT2G29530.1	Tim10/DDP family zinc finger protein	1.20896	0.00522263	0.00940789	3	3	4	83	9.33253	7.73779	1.07253	1.14217	1.10095	1.10522	0.963197	0.866197	0.913176	0.91419
AT5G16070.1	TCP-1/cpn60 chaperonin family protein	1.20804	0.0492458	0.0494949	2	12	17	535	58.8907	6.25244	1.18909	0.967664	1.11973	1.09216	0.936588	0.888462	0.887191	0.90408
AT4G13180.1	NAD(P)-binding Rossmann-fold superfamily protein	1.20779	0.0141904	0.0189446	2	2	2	263	27.639	6.771	1.10203	1.05805	1.12103	1.0937	0.983477	0.843117	0.890034	0.905543
AT1G07830.1	ribosomal protein L29 family protein	1.20758	0.00014492	0.00233874	1	1	2	144	16.8756	10.0522	1.09118	1.1121	1.08145	1.09491	0.887423	0.913704	0.918971	0.9067
AT1G35670.1	calcium-dependent protein kinase 2	1.20698	0.0252061	0.0297248	1	5	7	495	55.8801	5.42725	0.999275	1.12998	1.15377	1.09434	0.940544	0.859531	0.919952	0.906676
AT3G22660.1	rRNA processing protein-related	1.2066	0.0026503	0.00657575	2	3	4	293	33.1855	7.53271	1.05271	1.07064	1.13155	1.08497	0.872577	0.922494	0.902513	0.899195
AT1G29250.1	Alba DNA/RNA-binding protein	1.20599	0.00538829	0.00957513	1	4	12	130	14.5645	5.36377	1.06783	1.13011	1.08889	1.09561	0.964773	0.869658	0.890984	0.908472
AT3G16780.1	Ribosomal protein L19e family protein	1.20595	0.0257066	0.0300482	3	6	17	209	24.3143	11.2388	1.04919	1.06709	1.19045	1.10225	0.875518	0.890493	0.976014	0.914008
AT5G27120.1	NOP56-like pre RNA processing ribonucleoprotein	1.2059	0.00405732	0.00820828	6	8	10	533	58.7186	9.27588	1.14174	1.07021	1.11809	1.11001	0.960794	0.877536	0.923133	0.920488
AT1G26400.1	FAD-binding Berberine family protein	1.20519	0.00279504	0.00665743	1	1	1	527	58.6986	9.27588	1.04566	1.09668	1.13742	1.09325	0.927162	0.898004	0.8962	0.907122
AT2G42680.1	multiprotein bridging factor 1A	1.20473	0.00514546	0.00933424	2	5	7	142	15.6104	9.89111	1.13284	1.09847	1.05048	1.09393	0.95096	0.870186	0.90296	0.908035
AT3G11200.1	alfin-like 2	1.20257	0.0188013	0.0235464	2	2	2	246	27.8144	5.73193	1.0884	1.11897	1.05957	1.08898	0.961684	0.81684	0.93811	0.905545
AT3G07810.1	RNA-binding (RRM/RBD/RNP motifs) family protein	1.20153	0.00318711	0.00720463	1	1	1	494	51.8398	8.49951	1.07044	1.12993	1.08	1.09346	0.952461	0.901044	0.876656	0.910054
AT1G16000.1	unknown protein; BEST Arabidopsis thaliana protein match is: unknown protein (TAIR:AT1G80890.1); Has 41 Blast hits to 40 proteins in 10 species: Archae - 0; Bacteria - 0; Metazoa - 0; Fungi - 0; Plants - 41; Viruses - 0; Other Eukaryotes - 0 (source: NCBI BLink).	1.20094	0.000817271	0.00416287	1	1	1	86	9.28362	9.78857	1.06279	1.11155	1.10215	1.09217	0.924738	0.921045	0.882499	0.909427
AT3G03920.1	H/ACA ribonucleoprotein complex, subunit Gar1/Naf1 protein	1.20071	0.0337077	0.0376108	3	3	4	202	20.9696	11.4146	1.14319	1.03074	1.12185	1.09859	0.88582	1.00591	0.853132	0.914953
AT5G02450.1	Ribosomal protein L36e family protein	1.20053	0.00264501	0.00657575	2	5	11	108	12.182	11.5757	1.07626	1.06446	1.1259	1.08887	0.900262	0.944161	0.876565	0.906996
AT5G46030.1	unknown protein; CONTAINS InterPro DOMAIN/s: Protein of unknown function DUF701, zinc-binding putative (InterPro:IPR007808); Has 30201 Blast hits to 17322 proteins in 780 species: Archae - 12; Bacteria - 1396; Metazoa - 17338; Fungi - 3422; Plants - 5037; Viruses - 0; Other Eukaryotes - 2996 (source: NCBI BLink).	1.20021	0.000591039	0.00370103	1	1	1	120	13.8764	4.42432	1.08015	1.10624	1.09373	1.09337	0.928372	0.877247	0.92734	0.910986
Down-regulated in trm5-1
Accession	Description	trm/WT	t test p value	BH adjusted p-value	Unique Peptides	Peptides	PSMs	AAs	MW [kDa]	calc. pI	trm-1/REF	trm-2/REF	trm-3/REF	average trm	WT-1/REF	WT-2/REF	WT-3/REF	average WT
AT5G65840.1	Thioredoxin superfamily protein	0.833245	0.00147407	0.00484695	7	7	9	275	29.8643	8.27979	0.892952	0.880593	0.91471	0.896085	1.07983	1.10902	1.0374	1.07542
AT3G52340.1	sucrose-6F-phosphate phosphohydrolase 2	0.831921	0.000788131	0.00416287	1	1	1	423	48.6478	5.84619	0.920766	0.891496	0.913842	0.908701	1.09411	1.1225	1.06027	1.09229
AT1G50320.1	thioredoxin X	0.831595	0.00670951	0.0106301	4	4	9	182	19.6353	8.88037	0.927281	0.884804	0.920274	0.910786	1.16073	1.07251	1.05245	1.09523
AT3G22060.1	Receptor-like protein kinase-related family protein	0.830699	0.00805514	0.0121661	3	3	4	252	27.846	8.74854	0.870589	0.88765	0.946529	0.901589	1.12039	1.1092	1.02642	1.08534
AT2G32540.1	cellulose synthase-like B4	0.830208	0.0308017	0.0349174	2	2	2	755	84.931	7.38623	1.00822	0.851992	0.865638	0.908617	1.05257	1.08557	1.14519	1.09444
AT1G69295.1	plasmodesmata callose-binding protein 4	0.830024	0.00307216	0.00715026	1	1	1	222	22.0623	5.92236	0.916068	0.935677	0.873844	0.90853	1.09906	1.13142	1.05327	1.09458
AT1G62600.1	Flavin-binding monooxygenase family protein	0.829714	0.022852	0.0275692	1	1	1	452	51.2794	6.32861	0.99396	0.836089	0.894968	0.908339	1.04786	1.12535	1.11107	1.09476
AT1G09750.1	Eukaryotic aspartyl protease family protein	0.829707	0.000388216	0.00325707	7	7	8	449	47.6306	7.51807	0.899132	0.90096	0.923315	0.907802	1.08177	1.12407	1.07653	1.09412
AT1G76730.1	NagB/RpiA/CoA transferase-like superfamily protein	0.828955	0.00410523	0.00821871	5	5	5	354	39.5339	9.37842	0.914941	0.894029	0.871263	0.893411	1.10861	1.1039	1.02076	1.07776
AT3G56650.1	Mog1/PsbP/DUF1795-like photosystem II reaction center PsbP family protein	0.827813	6.86447e-05	0.00200595	6	6	10	262	28.6122	9.26123	0.915845	0.912819	0.908598	0.912421	1.11774	1.10768	1.0812	1.10221
ATCG00350.1	Photosystem I, PsaA/PsaB protein	0.827677	0.000207988	0.00287899	10	10	36	750	83.1776	7.10791	0.889296	0.912665	0.901289	0.901084	1.10022	1.10287	1.06298	1.08869
AT5G54270.1	light-harvesting chlorophyll B-binding protein 3	0.827663	0.00227293	0.00616268	4	4	15	265	28.6884	5.12256	0.89433	0.888727	0.942837	0.908631	1.13564	1.06229	1.09554	1.09783
AT5G42650.1	allene oxide synthase	0.82754	0.00561431	0.00971423	15	15	32	518	58.1604	8.66064	0.890044	0.884964	0.94614	0.907049	1.04239	1.10465	1.1412	1.09608
AT3G53650.1	Histone superfamily protein	0.82723	0.00233149	0.00619651	1	4	16	138	15.2155	10.0815	0.92702	0.926831	0.869808	0.907886	1.13729	1.07709	1.07813	1.0975
AT5G52920.1	plastidic pyruvate kinase beta subunit 1	0.826334	0.00139418	0.00476195	12	15	25	579	63.4813	7.03467	0.899969	0.882143	0.884651	0.888921	1.06596	1.04169	1.11957	1.07574
AT2G30170.2	Protein phosphatase 2C family protein	0.825857	0.00795867	0.0121661	3	3	4	221	23.8711	4.84326	0.933387	0.890447	0.931075	0.918303	1.12244	1.16986	1.04352	1.11194
AT2G20890.1	photosystem II reaction center PSB29 protein	0.825747	0.00041789	0.00325707	6	26	300	33.7745	9.12939	0.906618	0.910783	0.896824	0.904742	1.07454	1.12974	1.08271	1.09566
AT5G13410.1	FKBP-like peptidyl-prolyl cis-trans isomerase family protein	0.825607	0.00607077	0.0101556	5	9	256	27.7609	7.69385	0.869836	0.923306	0.925079	0.906074	1.07516	1.15909	1.05814	1.09746
AT2G34430.1	light-harvesting chlorophyll-protein complex II subunit B1	0.825451	0.0108149	0.015292	6	75	266	28.1522	5.2749	0.906183	0.921464	0.90671	0.911452	1.15694	1.02003	1.13559	1.10419
AT1G26230.2	TCP-1/cpn60 chaperonin family protein	0.825105	0.0181643	0.0228574	2	4	559	61.1248	8.76318	0.950532	0.881279	0.872837	0.901549	1.03566	1.17686	1.06543	1.09265
AT3G10060.1	FKBP-like peptidyl-prolyl cis-trans isomerase family protein	0.824536	0.00170156	0.00526977	7	11	230	24.4891	9.62744	0.939732	0.861724	0.902421	0.901292	1.1149	1.09165	1.07273	1.09309
AT1G29700.1	Metallo-hydrolase/oxidoreductase superfamily protein	0.824384	0.0307565	0.0349174	1	1	350	38.1273	6.17627	0.873805	0.958225	0.885433	0.905821	0.995415	1.13225	1.16869	1.09879
AT4G37980.1	elicitor-activated gene 3-1	0.823871	0.000257067	0.00305033	9	11	357	38.2204	7.1958	0.883235	0.918041	0.908658	0.903311	1.11653	1.09738	1.07536	1.09642
AT1G55210.1	Disease resistance-responsive (dirigent-like protein) family protein	0.82338	0.0150252	0.0196255	2	2	187	20.6046	9.42236	0.90115	0.910367	0.897515	0.903011	1.05221	1.04676	1.19117	1.09671
AT5G42070.1	unknown protein; FUNCTIONS IN: molecular_function unknown; INVOLVED IN: biological_process unknown; LOCATED IN: chloroplast thylakoid membrane, chloroplast; EXPRESSED IN: 21 plant structures; EXPRESSED DURING: 13 growth stages; Has 30201 Blast hits to 17322 proteins in 780 species: Archae - 12; Bacteria - 1396; Metazoa - 17338; Fungi - 3422; Plants - 5037; Viruses - 0; Other Eukaryotes - 2996 (so…	0.822811	0.0149186	0.019618	2	3	164	17.6705	8.60205	0.879151	0.942227	0.897272	0.906216	1.09876	1.02681	1.17853	1.10137
AT2G47400.1	CP12 domain-containing protein 1	0.822557	0.0274413	0.0317932	3	10	124	13.4786	4.93213	0.882909	0.858413	0.94574	0.895687	1.01198	1.18445	1.07029	1.08891
AT1G78680.2	gamma-glutamyl hydrolase 2	0.822411	0.000702965	0.00412107	1	1	333	36.934	7.13721	0.912419	0.925402	0.877582	0.905134	1.11492	1.07059	1.11625	1.10059
AT5G14430.1	S-adenosyl-L-methionine-dependent methyltransferases superfamily protein	0.821771	0.00458194	0.00879598	3	4	612	69.8188	8.85107	0.950606	0.856258	0.898221	0.901695	1.06	1.13053	1.10125	1.09726
AT4G26530.1	Aldolase superfamily protein	0.821617	0.00496443	0.00924642	14	51	358	38.2698	5.80811	0.889829	0.901953	0.912526	0.901436	1.10858	1.14997	1.0329	1.09715
AT1G73600.1	S-adenosyl-L-methionine-dependent methyltransferases superfamily protein	0.821316	0.000312381	0.00315985	15	22	490	56.3319	5.50342	0.918501	0.894645	0.884837	0.899328	1.06841	1.11269	1.10386	1.09498
AT3G51820.1	UbiA prenyltransferase family protein	0.821297	0.00745838	0.0116068	2	6	387	41.855	8.35303	0.886691	0.912368	0.910055	0.903038	1.16927	1.09242	1.03688	1.09953
AT2G23600.1	acetone-cyanohydrin lyase	0.82122	0.00315175	0.00720463	6	13	263	29.6475	5.33838	0.892829	0.932795	0.887755	0.90446	1.10834	1.1452	1.05055	1.10136
AT4G25080.4	magnesium-protoporphyrin IX methyltransferase	0.82062	0.000933877	0.00416287	15	38	245	27.131	6.93213	0.917407	0.921884	0.875175	0.904822	1.12454	1.06922	1.11406	1.10261
AT3G61870.1	unknown protein; FUNCTIONS IN: molecular_function unknown; INVOLVED IN: biological_process unknown; LOCATED IN: chloroplast, chloroplast inner membrane, chloroplast envelope; EXPRESSED IN: 23 plant structures; EXPRESSED DURING: 14 growth stages; Has 200 Blast hits to 200 proteins in 73 species: Archae - 0; Bacteria - 112; Metazoa - 0; Fungi - 0; Plants - 53; Viruses - 0; Other Eukaryotes - 35 (so…	0.819802	0.0231075	0.0277501	4	9	272	29.5668	9.30518	0.905809	0.893384	0.894803	0.897999	1.18902	0.998734	1.0984	1.09538
AT1G10200.1	GATA type zinc finger transcription factor family protein	0.818947	0.00809534	0.0121661	3	3	190	21.0264	8.83643	0.849587	0.918466	0.930796	0.899617	1.07506	1.16154	1.05892	1.0985
AT3G23450.1	unknown protein; FUNCTIONS IN: molecular_function unknown; INVOLVED IN: biological_process unknown; LOCATED IN: endomembrane system; EXPRESSED IN: 14 plant structures; EXPRESSED DURING: 8 growth stages; Has 694543 Blast hits to 47111 proteins in 2535 species: Archae - 1794; Bacteria - 163056; Metazoa - 258989; Fungi - 49151; Plants - 70496; Viruses - 8919; Other Eukaryotes - 142138 (source: NCBI …	0.817891	0.0243754	0.0288771	2	3	452	34.8446	10.814	0.911323	0.871938	0.915096	0.899452	1.0514	1.20973	1.03803	1.09972
AT1G15820.1	light harvesting complex photosystem II subunit 6	0.81737	3.22166e-05	0.00190711	11	45	258	27.5051	7.40088	0.895351	0.902031	0.901445	0.899609	1.11346	1.08212	1.10626	1.10061
AT1G03475.1	Coproporphyrinogen III oxidase	0.816582	0.000919686	0.00416287	12	27	386	43.7687	6.69775	0.92364	0.858983	0.908584	0.897069	1.08758	1.12243	1.08568	1.09857
AT5G02160.1	unknown protein; FUNCTIONS IN: molecular_function unknown; INVOLVED IN: biological_process unknown; LOCATED IN: chloroplast thylakoid membrane; EXPRESSED IN: 23 plant structures; EXPRESSED DURING: 13 growth stages; Has 121 Blast hits to 121 proteins in 17 species: Archae - 0; Bacteria - 0; Metazoa - 0; Fungi - 0; Plants - 121; Viruses - 0; Other Eukaryotes - 0 (source: NCBI BLink).	0.816441	0.044379	0.0463208	2	3	129	13.37	9.49561	0.893608	0.858265	0.902135	0.884669	1.1694	1.13067	0.950636	1.08357
AT1G31190.1	myo-inositol monophosphatase like 1	0.814498	0.000446036	0.00325707	5	11	371	40.4196	7.23975	0.9408	0.878935	0.893478	0.904404	1.10021	1.11306	1.11788	1.11038
AT4G12980.1	Auxin-responsive family protein	0.814323	6.25556e-05	0.00200595	2	3	394	42.2022	9.71533	0.887308	0.899795	0.910665	0.899256	1.12299	1.09133	1.09858	1.1043
AT4G24350.2	Phosphorylase superfamily protein	0.81416	0.00637381	0.0103476	4	4	242	26.3301	5.10986	0.922832	0.842531	0.911833	0.892398	1.08066	1.15354	1.05409	1.0961
AT2G10940.1	Bifunctional inhibitor/lipid-transfer protein/seed storage 2S albumin superfamily protein	0.813993	0.0126397	0.0174044	6	29	291	29.6289	9.39307	0.876837	0.895804	0.911772	0.894804	1.08423	1.18621	1.02739	1.09928
AT4G28750.1	Photosystem I reaction centre subunit IV / PsaE protein	0.81205	0.00011732	0.00233874	6	41	143	14.9578	9.92041	0.910509	0.883764	0.880571	0.891614	1.09105	1.0851	1.11779	1.09798
AT1G80030.1	Molecular chaperone Hsp40/DnaJ family protein	0.811796	0.000443435	0.00325707	8	9	500	53.787	7.56201	0.886284	0.933452	0.888023	0.902587	1.08754	1.12189	1.12609	1.11184
AT4G15800.1	ralf-like 33	0.811507	0.00358071	0.00784771	1	1	116	12.7974	9.18799	0.883215	0.873555	0.930575	0.895782	1.04902	1.14758	1.11495	1.10385
AT2G20830.1	transferases;folic acid binding	0.811441	0.0019323	0.00553995	1	1	297	32.1163	6.78564	0.942903	0.879024	0.873624	0.898517	1.12267	1.07075	1.12851	1.10731
AT4G23400.1	plasma membrane intrinsic protein 1;5	0.810928	0.0058056	0.00991476	5	13	287	30.627	8.82178	0.878044	0.906055	0.914951	0.899683	1.06589	1.18398	1.07848	1.10945
AT1G54780.1	thylakoid lumen 18.3 kDa protein	0.810367	0.00170316	0.00526977	9	25	285	31.1195	8.83643	0.886756	0.911334	0.889085	0.895725	1.13253	1.05157	1.1319	1.10533
AT4G09010.1	ascorbate peroxidase 4	0.810142	4.86709e-05	0.00190711	12	39	349	37.9105	8.45557	0.88969	0.887922	0.909294	0.895635	1.08982	1.12075	1.10601	1.10553
AT5G44130.1	FASCICLIN-like arabinogalactan protein 13 precursor	0.809802	0.00842367	0.0124791	4	7	247	26.1888	5.66846	0.923449	0.867568	0.892503	0.894507	1.08578	1.18192	1.04609	1.1046
AT3G27840.1	ribosomal protein L12-B	0.809476	0.0465157	0.047975	1	1	193	20.5809	7.57666	0.934602	0.913915	0.851339	0.899952	1.1026	0.995284	1.23743	1.11177
AT4G36810.1	geranylgeranyl pyrophosphate synthase 1	0.809459	0.0357037	0.0394541	1	3	371	40.1489	6.63916	0.921905	0.936187	0.837726	0.898606	1.04404	1.05527	1.23109	1.11013
AT5G62350.1	Plant invertase/pectin methylesterase inhibitor superfamily protein	0.809423	0.00610107	0.0101556	3	3	202	22.1653	9.05615	0.866765	0.915662	0.912321	0.898249	1.09547	1.1792	1.05456	1.10974
AT5G25460.1	Protein of unknown function, DUF642	0.809194	0.00211864	0.00586529	8	17	369	39.9525	7.35693	0.914873	0.915949	0.858683	0.896502	1.0937	1.15324	1.07675	1.10789
AT1G26761.1	Arabinanase/levansucrase/invertase	0.808924	0.0410029	0.0445611	2	2	444	49.7093	6.66846	0.986444	0.763258	0.932373	0.894025	1.06093	1.11707	1.13761	1.1052
AT4G38970.1	fructose-bisphosphate aldolase 2	0.808859	0.000911361	0.00416287	18	107	398	42.9611	7.23975	0.899622	0.899825	0.890186	0.896544	1.10408	1.15163	1.06951	1.10841
AT3G20820.1	Leucine-rich repeat (LRR) family protein	0.807811	0.000268159	0.00305033	8	12	365	39.8366	8.41162	0.889465	0.88987	0.896077	0.891804	1.09673	1.1371	1.0781	1.10398
AT4G35090.1	catalase 2	0.807716	0.0032325	0.00720463	18	57	492	56.8953	7.12256	0.880757	0.895973	0.903876	0.893535	1.10917	1.16196	1.04762	1.10625
ATCG00140.1	ATP synthase subunit C family protein	0.80761	0.00279878	0.00665743	1	6	81	7.97138	4.90674	0.86695	0.923222	0.880939	0.89037	1.13946	1.04855	1.11942	1.10248
AT3G60130.3	beta glucosidase 16	0.80756	0.0431613	0.0462212	2	2	451	51.0547	6.48096	0.947983	0.829898	0.903597	0.893826	0.980681	1.19111	1.14867	1.10682
AT3G06000.1	RNI-like superfamily protein	0.806968	0.0253169	0.0297248	2	2	211	23.5508	4.69092	0.823637	0.949254	0.914205	0.895699	1.09009	1.03704	1.20274	1.10996
AT1G78260.2	RNA-binding (RRM/RBD/RNP motifs) family protein	0.806264	0.00796265	0.0121661	1	1	271	30.3156	8.93896	0.973113	0.834216	0.874991	0.894107	1.12643	1.12041	1.08001	1.10895
AT5G14780.1	formate dehydrogenase	0.806116	0.000924186	0.00416287	10	18	384	42.3826	7.50342	0.896116	0.885845	0.894141	0.892034	1.12256	1.13817	1.05902	1.10658
AT3G04290.1	Li-tolerant lipase 1	0.804394	0.0037746	0.00799746	2	2	366	40.1232	5.89697	0.893832	0.861997	0.915877	0.890568	1.13224	1.14598	1.04317	1.10713
AT1G31220.1	Formyl transferase	0.803919	0.0464845	0.047975	1	1	292	32.1499	8.77783	0.978468	0.808679	0.885991	0.891046	1.17893	1.15378	0.992424	1.10838
AT5G21430.1	Chaperone DnaJ-domain superfamily protein	0.802841	0.00132951	0.00470727	7	10	218	24.4224	5.13525	0.933043	0.861179	0.88397	0.892731	1.13217	1.12642	1.0773	1.11196
AT3G09580.1	FAD/NAD(P)-binding oxidoreductase family protein	0.801535	0.00107098	0.00440106	5	7	477	52.2263	7.48877	0.892813	0.872761	0.907459	0.891011	1.13817	1.13315	1.06358	1.11163
AT1G52230.1	photosystem I subunit H2	0.800542	0.00193793	0.00553995	3	5	145	15.2641	9.90576	0.884961	0.882977	0.946658	0.904865	1.1555	1.15131	1.08414	1.13032
AT3G47470.1	light-harvesting chlorophyll-protein complex I subunit A4	0.799618	0.0164622	0.0210172	6	30	251	27.7161	6.69775	0.892778	0.882619	0.90078	0.892059	1.21578	1.0222	1.10884	1.11561
AT1G31330.1	photosystem I subunit F	0.799609	0.00234614	0.00619651	10	40	221	24.1578	9.53955	0.905826	0.889734	0.87788	0.891147	1.17411	1.10205	1.06727	1.11448
AT2G39080.1	NAD(P)-binding Rossmann-fold superfamily protein	0.799408	0.00396806	0.00815313	2	3	351	38.1862	8.01611	0.833063	0.870588	0.923672	0.875774	1.04644	1.1062	1.13395	1.09553
AT3G45140.1	lipoxygenase 2	0.79879	0.043936	0.0463208	44	148	896	101.982	5.61768	0.864544	0.868406	0.936887	0.889946	1.04433	1.03691	1.26111	1.11412
ATCG00150.1	ATPase, F0 complex, subunit A protein	0.797977	0.0243002	0.0288771	1	1	249	27.3327	5.04639	0.81299	0.947152	0.902057	0.8874	1.18805	1.13047	1.01766	1.11206
AT5G57170.1	Tautomerase/MIF superfamily protein	0.797677	0.0443835	0.0463208	1	1	115	12.3164	5.05908	0.906283	0.790797	0.961595	0.886225	1.22537	1.08019	1.02746	1.11101
AT5G47880.1	eukaryotic release factor 1-1	0.797114	0.00380108	0.00799746	6	10	436	48.6927	5.30029	0.92343	0.802194	0.854648	0.860091	1.0955	1.06391	1.0776	1.07901
AT1G78915.1	Tetratricopeptide repeat (TPR)-like superfamily protein	0.795974	0.000832459	0.00416287	3	4	385	42.5532	7.95752	0.852433	0.881195	0.909058	0.880895	1.06981	1.11782	1.13243	1.10669
AT4G05180.1	photosystem II subunit Q-2	0.794769	0.00216607	0.00593413	9	49	230	24.6281	9.71533	0.856213	0.901674	0.915175	0.891021	1.13031	1.16344	1.06957	1.12111
AT1G65590.1	beta-hexosaminidase 3	0.79457	0.000366826	0.00325707	8	10	535	59.9758	8.14795	0.864176	0.914074	0.882545	0.886932	1.10598	1.14484	1.09791	1.11624
AT3G14210.1	epithiospecifier modifier 1	0.794359	0.00134238	0.00470727	11	48	392	44.0322	7.72314	0.88811	0.8771	0.887276	0.884162	1.09862	1.16801	1.07251	1.11305
AT1G29660.1	GDSL-like Lipase/Acylhydrolase superfamily protein	0.793529	0.00313294	0.00720463	6	12	364	40.1166	5.36377	0.908115	0.925469	0.842981	0.892189	1.07328	1.16215	1.13755	1.12433
AT3G51600.1	lipid transfer protein 5	0.793474	0.00282537	0.00665743	2	2	118	12.4864	10.3599	0.920427	0.840279	0.893261	0.884656	1.06684	1.12094	1.15696	1.11491
AT5G27670.1	histone H2A 7	0.792318	0.00183858	0.0054331	4	7	150	15.8987	10.4624	0.863932	0.881658	0.883454	0.876348	1.07488	1.16743	1.07586	1.10606
AT4G39710.2	FK506-binding protein 16-2	0.792182	0.00384693	0.0080297	4	8	177	19.1006	8.07471	0.885656	0.917195	0.840482	0.881111	1.05151	1.15589	1.12937	1.11226
AT4G00165.1	Bifunctional inhibitor/lipid-transfer protein/seed storage 2S albumin superfamily protein	0.791903	0.0141705	0.0189446	2	3	128	13.3291	8.57275	0.854844	0.904896	0.895841	0.885193	1.07147	1.22505	1.0569	1.11781
AT4G14030.1	selenium-binding protein 1	0.791332	0.00622567	0.0102737	8	18	490	54.0229	5.66846	0.848906	0.931266	0.859655	0.879942	1.11904	1.16993	1.04695	1.11198
AT1G03870.1	FASCICLIN-like arabinoogalactan 9	0.790491	0.00444516	0.00859615	2	6	247	26.0987	8.88037	0.95074	0.837773	0.844869	0.877794	1.13261	1.07733	1.12139	1.11044
AT5G46290.2	3-ketoacyl-acyl carrier protein synthase I	0.78923	0.00502752	0.00924642	6	16	418	44.7018	8.48486	0.84884	0.896156	0.902104	0.882367	1.07604	1.19521	1.08278	1.11801
AT3G15520.1	Cyclophilin-like peptidyl-prolyl cis-trans isomerase family protein	0.789204	0.00101108	0.00428895	9	15	466	50.4514	7.06396	0.862598	0.89728	0.87221	0.877362	1.09449	1.16145	1.07918	1.11171
AT1G54350.1	ABC transporter family protein	0.787687	0.0349133	0.0387434	1	1	706	80.0041	6.15088	0.819994	0.937538	0.896251	0.884594	1.09746	1.0206	1.25102	1.12303
AT1G60550.1	enoyl-CoA hydratase/isomerase D	0.78625	0.000904955	0.00416287	6	7	337	37.0328	7.25439	0.871677	0.893907	0.867873	0.877819	1.07203	1.11612	1.16124	1.11646
AT3G63160.1	FUNCTIONS IN: molecular_function unknown; INVOLVED IN: biological_process unknown; LOCATED IN: chloroplast outer membrane, thylakoid, chloroplast thylakoid membrane, chloroplast, chloroplast envelope; EXPRESSED IN: 21 plant structures; EXPRESSED DURING: 13 growth stages; BEST Arabidopsis thaliana protein match is: outer envelope membrane protein 7 (TAIR:AT3G52420.1); Has 26 Blast hits to 26 prote…	0.785739	0.000432762	0.00325707	3	10	69	7.25192	9.08545	0.906904	0.837497	0.893973	0.879458	1.10537	1.12549	1.12696	1.11928
AT5G54760.1	Translation initiation factor SUI1 family protein	0.785542	0.00123438	0.00469231	4	8	113	12.6125	8.42627	0.889462	0.867884	0.869606	0.875651	1.13781	1.1483	1.05801	1.11471
AT5G24165.1	unknown protein; FUNCTIONS IN: molecular_function unknown; INVOLVED IN: biological_process unknown; LOCATED IN: chloroplast; EXPRESSED IN: 22 plant structures; EXPRESSED DURING: 13 growth stages; BEST Arabidopsis thaliana protein match is: unknown protein (TAIR:AT4G23885.1); Has 30201 Blast hits to 17322 proteins in 780 species: Archae - 12; Bacteria - 1396; Metazoa - 17338; Fungi - 3422; Plants …	0.784267	0.00367039	0.00791239	3	6	75	7.75109	10.3745	0.834128	0.885798	0.900434	0.873454	1.08358	1.18143	1.07615	1.11372
AT3G47630.1	FUNCTIONS IN: molecular_function unknown; INVOLVED IN: biological_process unknown; LOCATED IN: endomembrane system; EXPRESSED IN: 21 plant structures; EXPRESSED DURING: 13 growth stages; CONTAINS InterPro DOMAIN/s: Mitochondrial matrix Mmp37 (InterPro:IPR015222); Has 325 Blast hits to 325 proteins in 172 species: Archae - 0; Bacteria - 0; Metazoa - 109; Fungi - 140; Plants - 43; Viruses - 0; Othe…	0.783705	0.00413216	0.00821871	1	1	320	36.0153	9.15869	0.936295	0.860423	0.842915	0.879878	1.12461	1.17293	1.0706	1.12272
AT3G26570.2	phosphate transporter 2;1	0.783472	0.0110499	0.0155408	4	7	587	61.379	9.17334	0.806208	0.923412	0.89354	0.874386	1.17166	1.14045	1.03601	1.11604
AT3G28300.1	Protein of unknown function (DUF677)	0.781785	0.0161605	0.0208344	10	16	385	42.928	5.90967	0.891522	0.834498	0.924734	0.883584	1.06556	1.0838	1.24128	1.13021
AT1G09340.1	chloroplast RNA binding	0.779988	2.85014e-05	0.00190711	19	110	378	42.593	8.1626	0.869808	0.879155	0.874056	0.87434	1.11848	1.14155	1.10287	1.12097
AT5G36870.1	glucan synthase-like 9	0.779129	0.00123973	0.00469231	1	1	1871	215.998	8.26514	0.886244	0.90706	0.841381	0.878228	1.08139	1.13977	1.16042	1.12719
AT1G61520.2	photosystem I light harvesting complex gene 3	0.77902	9.01685e-05	0.00233874	6	31	218	23.731	5.89697	0.849179	0.869537	0.885021	0.867912	1.12975	1.1207	1.09188	1.11411
AT3G54890.4	photosystem I light harvesting complex gene 1	0.777658	0.000960535	0.00421035	4	23	213	23.2469	7.43018	0.848344	0.876997	0.901736	0.875692	1.17409	1.09575	1.10834	1.12606
AT3G07390.1	auxin-responsive family protein	0.777511	0.00147436	0.00484695	1	2	273	27.909	8.17725	0.827225	0.932066	0.868175	0.875822	1.13604	1.10567	1.13762	1.12644
AT1G64680.1	unknown protein; BEST Arabidopsis thaliana protein match is: unknown protein (TAIR:AT1G03055.1); Has 146 Blast hits to 146 proteins in 26 species: Archae - 0; Bacteria - 6; Metazoa - 0; Fungi - 0; Plants - 125; Viruses - 0; Other Eukaryotes - 15 (source: NCBI BLink).	0.776176	0.00856818	0.012589	2	2	250	28.144	8.20654	0.911023	0.814791	0.886119	0.870644	1.12459	1.19552	1.04501	1.12171
AT4G19170.1	nine-cis-epoxycarotenoid dioxygenase 4	0.775918	0.0032929	0.00727758	4	4	595	65.5603	6.91748	0.928374	0.863099	0.838087	0.87652	1.07573	1.1796	1.13364	1.12966
AT3G54140.1	peptide transporter 1	0.77499	0.0021116	0.00586529	2	2	570	63.9926	8.30908	0.864582	0.907816	0.852782	0.87506	1.07816	1.12165	1.18757	1.12912
AT2G05310.1	unknown protein; FUNCTIONS IN: molecular_function unknown; INVOLVED IN: biological_process unknown; LOCATED IN: chloroplast; BEST Arabidopsis thaliana protein match is: unknown protein (TAIR:AT4G13500.1); Has 50 Blast hits to 50 proteins in 20 species: Archae - 0; Bacteria - 0; Metazoa - 0; Fungi - 0; Plants - 50; Viruses - 0; Other Eukaryotes - 0 (source: NCBI BLink).	0.772077	0.0337496	0.0376108	2	4	125	13.7991	8.79248	0.834479	0.831262	0.948591	0.871444	1.06432	1.05071	1.27108	1.1287
AT2G39730.2	rubisco activase	0.767323	0.00191666	0.00553995	20	255	446	49.0686	7.6792	0.835566	0.904597	0.868012	0.869392	1.19149	1.11808	1.08949	1.13302
AT4G12730.1	FASCICLIN-like arabinogalactan 2	0.767261	0.00415623	0.00821871	3	6	403	43.4212	6.62451	0.886667	0.894708	0.814982	0.865452	1.09397	1.20126	1.0887	1.12798
AT5G65685.2	UDP-Glycosyltransferase superfamily protein	0.765066	0.0032091	0.00720463	1	1	449	50.9039	5.60498	0.927191	0.838176	0.838135	0.867834	1.11298	1.1935	1.0965	1.13433
AT4G16500.1	Cystatin/monellin superfamily protein	0.761806	0.000432087	0.00325707	4	5	117	12.5479	9.12939	0.872598	0.855393	0.855398	0.86113	1.16198	1.08215	1.14701	1.13038
AT2G25800.1	Protein of unknown function (DUF810)	0.757293	0.0490751	0.0494949	1	1	987	109.895	8.1626	1.04537	0.811034	0.740267	0.865558	1.08275	1.20963	1.1365	1.14296
AT3G15840.4	post-illumination chlorophyll fluorescence increase	0.757224	0.000458218	0.00325707	5	6	214	23.9744	4.88135	0.832736	0.876321	0.887769	0.865609	1.13465	1.18176	1.11299	1.14313
AT1G03130.1	photosystem I subunit D-2	0.757205	0.000574412	0.00370103	12	77	204	22.2927	9.77393	0.866732	0.817703	0.892573	0.859003	1.15315	1.14944	1.10073	1.13444
AT2G43360.1	Radical SAM superfamily protein	0.757166	0.0166265	0.0211245	1	1	378	41.6548	6.96143	0.943466	0.789584	0.850898	0.861316	1.11742	1.23854	1.05671	1.13755
AT1G21770.1	Acyl-CoA N-acyltransferases (NAT) superfamily protein	0.75712	0.000582069	0.00370103	3	4	111	12.5532	6.87354	0.853037	0.830533	0.894899	0.85949	1.17565	1.10964	1.12033	1.13521
AT2G33330.1	plasmodesmata-located protein 3	0.756668	0.000705127	0.00412107	1	1	304	32.6372	8.73389	0.875218	0.89092	0.827328	0.864489	1.14059	1.10462	1.18227	1.14249
AT1G68100.1	ZIP metal ion transporter family	0.75568	0.00132648	0.00470727	2	2	469	50.551	6.31592	0.927037	0.823643	0.837645	0.862775	1.16508	1.12026	1.13982	1.14172
AT4G16015.1	Cysteine/Histidine-rich C1 domain family protein	0.755265	0.00495591	0.00924642	2	3	535	61.9551	6.48096	0.762437	0.918433	0.888316	0.856396	1.11908	1.15933	1.12329	1.1339
AT5G24490.1	30S ribosomal protein, putative	0.755242	0.000283875	0.00305033	7	19	308	34.835	6.75635	0.830939	0.87929	0.870225	0.860152	1.17158	1.13599	1.10916	1.13891
AT3G59690.1	IQ-domain 13	0.751754	0.0374808	0.0410728	1	1	517	58.4693	10.8872	0.803746	0.978093	0.808598	0.863479	1.20998	1.00268	1.2332	1.14862
AT5G15530.1	biotin carboxyl carrier protein 2	0.749991	5.07595e-05	0.00190711	2	2	255	27.262	7.79639	0.863383	0.844718	0.865641	0.857914	1.16859	1.14302	1.12009	1.1439
AT2G38710.1	AMMECR1 family	0.748188	0.00535278	0.00957513	1	1	214	24.2293	6.80029	0.852069	0.836813	0.885452	0.858111	1.19349	1.04587	1.2014	1.14692
AT2G22990.2	sinapoylglucose 1	0.746688	4.05005e-05	0.00190711	4	7	319	36.7768	6.93213	0.879865	0.85085	0.849757	0.860157	1.13487	1.17311	1.1479	1.15196
AT3G46630.1	Protein of unknown function (DUF3223)	0.74206	0.000115128	0.00233874	3	6	207	24.1764	8.17725	0.825897	0.885462	0.855919	0.855759	1.13352	1.16167	1.16447	1.15322
AT1G25230.1	Calcineurin-like metallo-phosphoesterase superfamily protein	0.738392	0.00157664	0.00505678	1	1	339	38.2169	5.2749	0.809566	0.877071	0.860846	0.849161	1.14277	1.2117	1.09557	1.15001
AT1G31690.1	Copper amine oxidase family protein	0.737394	0.000363667	0.00325707	6	8	677	76.6247	7.40088	0.847397	0.810588	0.900053	0.852679	1.15811	1.16912	1.14179	1.15634
AT3G28270.2	Protein of unknown function (DUF677)	0.73648	0.00239148	0.00619651	9	11	374	41.5867	5.31299	0.886342	0.81546	0.849777	0.850526	1.10127	1.13134	1.23195	1.15485
AT1G52190.1	Major facilitator superfamily protein	0.73519	0.032973	0.0372184	1	2	607	66.8606	8.82178	0.889819	0.778048	0.8712	0.846355	1.23596	0.97358	1.24408	1.15121
AT1G51890.2	Leucine-rich repeat protein kinase family protein	0.734294	0.00106006	0.00440106	2	2	828	93.3142	6.7417	0.883039	0.777269	0.88153	0.847279	1.16733	1.13671	1.15757	1.15387
AT1G21500.1	unknown protein; Has 29 Blast hits to 29 proteins in 12 species: Archae - 0; Bacteria - 0; Metazoa - 0; Fungi - 2; Plants - 27; Viruses - 0; Other Eukaryotes - 0 (source: NCBI BLink).	0.73298	0.0024009	0.00619651	3	10	126	13.2503	10.6528	0.806777	0.844579	0.864736	0.838698	1.08797	1.2249	1.11982	1.14423
AT3G28500.1	60S acidic ribosomal protein family	0.73249	0.0134425	0.0182827	2	2	115	11.728	4.67822	0.917832	0.801143	0.817861	0.845612	1.10339	1.07943	1.28048	1.15444
AT1G53840.1	pectin methylesterase 1	0.728666	0.000901834	0.00416287	2	2	586	64.1089	8.32373	0.86808	0.810334	0.842392	0.840269	1.21379	1.13549	1.1102	1.15316
AT1G69740.1	Aldolase superfamily protein	0.728066	0.000927095	0.00416287	13	30	430	46.6607	7.31299	0.858557	0.826211	0.844626	0.843131	1.09653	1.21631	1.16129	1.15804
AT5G24420.1	6-phosphogluconolactonase 5	0.725549	0.0202432	0.0248784	2	3	252	28.4575	6.22705	0.816519	0.813395	0.897736	0.84255	1.0627	1.09966	1.32142	1.16126
AT5G11680.1	FUNCTIONS IN: molecular_function unknown; INVOLVED IN: biological_process unknown; LOCATED IN: cytosol, plasma membrane; EXPRESSED IN: 26 plant structures; EXPRESSED DURING: 15 growth stages; CONTAINS InterPro DOMAIN/s: WW-domain-binding protein (InterPro:IPR018826); Has 1807 Blast hits to 1807 proteins in 277 species: Archae - 0; Bacteria - 0; Metazoa - 736; Fungi - 347; Plants - 385; Viruses - …	0.724826	0.0101178	0.0146207	2	2	207	23.0916	6.85889	0.876986	0.74	0.894473	0.837153	1.08251	1.24864	1.13376	1.15497
AT4G30950.1	fatty acid desaturase 6	0.724627	0.0012696	0.00469231	4	13	448	51.1924	8.83643	0.851246	0.837952	0.83393	0.841042	1.18683	1.08363	1.2115	1.16066
AT2G27290.1	Protein of unknown function (DUF1279)	0.724245	0.0147389	0.019479	2	3	201	21.7465	9.14404	0.838178	0.807461	0.891476	0.845705	1.18056	1.28968	1.03287	1.16771
AT2G02100.1	low-molecular-weight cysteine-rich 69	0.722921	0.0492684	0.0494949	1	1	77	8.51803	8.95361	0.726372	0.959551	0.832644	0.839522	0.978542	1.28732	1.21801	1.16129
AT1G36730.1	Translation initiation factor IF2/IF5	0.71713	0.000438971	0.00325707	4	4	439	48.5915	6.3667	0.840584	0.851759	0.80797	0.833438	1.16649	1.20823	1.11184	1.16218
AT4G12310.1	cytochrome P450, family 706, subfamily A, polypeptide 5	0.714391	0.0421226	0.0454026	3	6	520	59.0076	6.69775	0.993037	0.75084	0.773284	0.839054	1.13891	1.05078	1.33382	1.1745
AT1G22630.1	unknown protein; LOCATED IN: chloroplast; EXPRESSED IN: 21 plant structures; EXPRESSED DURING: 13 growth stages; Has 87 Blast hits to 86 proteins in 34 species: Archae - 0; Bacteria - 13; Metazoa - 27; Fungi - 0; Plants - 40; Viruses - 0; Other Eukaryotes - 7 (source: NCBI BLink).	0.713625	0.00273744	0.00665743	2	4	110	11.8708	8.89502	0.789194	0.825484	0.870507	0.828395	1.13163	1.24838	1.10247	1.16083
AT5G15970.1	stress-responsive protein (KIN2) / stress-induced protein (KIN2) / cold-responsive protein (COR6.6) / cold-regulated protein (COR6.6)	0.699223	0.00128459	0.00469231	3	11	66	6.54734	9.12939	0.808354	0.838432	0.822785	0.82319	1.09896	1.18552	1.2474	1.17729
AT3G52090.1	DNA-directed RNA polymerase, RBP11-like	0.698368	0.0198698	0.0245341	1	1	116	13.5549	6.94678	0.864519	0.82055	0.793294	0.826121	1.0374	1.15611	1.35529	1.18293
AT1G51400.1	Photosystem II 5 kD protein	0.696331	0.0237276	0.0283653	1	5	106	11.3537	9.77393	0.879162	0.778756	0.789159	0.815692	1.0327	1.35296	1.12859	1.17142
AT4G02770.1	photosystem I subunit D-1	0.695775	0.00774736	0.0119856	12	79	208	22.5838	9.77393	0.789381	0.793971	0.804444	0.795932	1.07767	1.28414	1.07004	1.14395
AT1G20340.1	Cupredoxin superfamily protein	0.681851	0.00596063	0.0101138	1	11	167	16.9737	5.19873	0.739967	0.838377	0.86639	0.814911	1.11964	1.31399	1.15181	1.19515
AT1G74670.1	Gibberellin-regulated family protein	0.681159	0.0121518	0.0169097	3	3	101	11.3333	8.646	0.721968	0.883605	0.78519	0.796921	1.11094	1.31263	1.08627	1.16995
AT1G23090.1	sulfate transporter 91	0.677991	0.0227137	0.0275286	2	2	631	69.0259	8.95361	0.729251	0.666617	0.973983	0.78995	1.13203	1.1086	1.25476	1.16513
AT3G08770.1	lipid transfer protein 6	0.677106	4.02313e-05	0.00190711	5	6	113	11.8699	7.47412	0.797413	0.777675	0.837233	0.804107	1.17908	1.20514	1.17847	1.18756
AT5G23820.1	MD-2-related lipid recognition domain-containing protein	0.670863	0.00363038	0.00789082	2	9	164	17.896	4.67822	0.7813	0.750687	0.866591	0.799526	1.08852	1.21592	1.27093	1.19179
AT2G43550.1	Scorpion toxin-like knottin superfamily protein	0.668527	0.010407	0.0147949	2	2	103	11.864	8.89502	0.817837	0.757143	0.829319	0.801433	1.03874	1.23247	1.3252	1.1988
AT1G03260.1	SNARE associated Golgi protein family	0.667472	0.0400653	0.0437228	1	1	274	29.5303	8.54346	0.691756	0.695626	1.00795	0.798442	1.09626	1.13468	1.35771	1.19622
AT1G14380.1	IQ-domain 28	0.663206	0.0103863	0.0147949	1	1	664	72.8049	9.31982	0.857579	0.827989	0.723155	0.802908	1.30128	1.05175	1.27891	1.21065
AT1G33270.2	Acyl transferase/acyl hydrolase/lysophospholipase superfamily protein	0.642924	0.0494949	0.0494949	1	2	287	31.4483	8.98291	1.19267	0.687789	0.91818	0.93288	1.22154	1.54692	1.58452	1.451
AT5G33280.1	Voltage-gated chloride channel family protein	0.627352	0.0366217	0.0402992	1	1	765	83.8031	8.6167	0.928748	0.716433	0.675121	0.773434	0.98266	1.38808	1.32783	1.23286
AT1G16300.1	glyceraldehyde-3-phosphate dehydrogenase of plastid 2	0.626816	0.000410344	0.00325707	3	10	420	44.8179	8.6167	0.733972	0.82373	0.758242	0.771982	1.23093	1.17506	1.28878	1.23159
AT5G21930.1	P-type ATPase of Arabidopsis 2	0.619952	0.00502183	0.00924642	1	1	883	94.201	6.3667	0.803656	0.695223	0.795689	0.764856	1.3729	1.21821	1.11009	1.23373
AT1G10830.1	15-cis-zeta-carotene isomerase	0.584101	0.0483837	0.0494949	2	2	367	40.8248	9.39307	0.882184	0.698714	0.621295	0.734064	0.964678	1.25456	1.55098	1.25674
AT2G45180.1	Bifunctional inhibitor/lipid-transfer protein/seed storage 2S albumin superfamily protein	0.561363	0.00182215	0.0054331	3	6	134	13.9456	8.99756	0.781664	0.666875	0.684486	0.711008	1.27342	1.37835	1.14795	1.26658
AT2G39480.1	P-glycoprotein 6	0.437341	0.0134861	0.0182827	1	1	1407	155.777	6.0874	0.625329	0.557557	0.655917	0.612934	1.30626	1.14016	1.75808	1.4015
AT5G50160.1	ferric reduction oxidase 8	0.404351	0.0264182	0.0307433	1	1	728	83.1764	9.53955	0.640264	0.354773	0.711401	0.568813	1.48386	1.74025	0.996086	1.40673
